# Supplementary material for: The donor/acceptor edge-modification: an effective strategy to modulate the electronic and magnetic behaviors of zigzag silicon carbon nanoribbons
Source: Royal Society of Chemistry journal article supplement (doi:10.1039/c3cp52396a), 2013-01-01
Supplement: c3cp52396a.pdf [file c3cp52396a.pdf]

# **The Donor/Acceptor Edge-Modification: An Effective Strategy to Modulate the Electronic and Magnetic Behaviors of Zigzag Silicon Carbon Nanoribbons**

Xiuling Ding, Guangtao Yu,\* Xuri Huang, Wei Chen\*

*The State Key Laboratory of Theoretical and Computational Chemistry, Institute of Theoretical  
Chemistry, Jilin University, Changchun 130023, People's Republic of China*

\* To whom correspondence should be addressed. Email: [yugt@jlu.edu.cn](mailto:yugt@jlu.edu.cn)  
(G.Y.), [xychwei@gmail.com](mailto:xychwei@gmail.com) (W.C.)

It is known that the edge modification with electron donor/acceptor group can break the energy degeneracy between ferromagnetic (FM) and antiferromagnetic (AFM) states of the pristine zSiCNR, and the sole intriguing half-metallicity or metallicity corresponding to the ground state of FM/AFM can be achieved in the decorated 8-zSiCNR, as discussed in detail at the text. Besides, here we also provided electronic and magnetic properties of the parallel AFM (FM) state corresponding to the ground state of FM (AFM) for the studied systems with the unilateral/bilateral modification, where FM metal, AFM metal and AFM half-metal can also be observed, as shown in Tables S1 and S2, as well as Figures S1, S2, S3 and S4.

**Table S1.** The magnetic state, the electronic property and the band gap in minority channel of the parallel state corresponding to the ground state for the unilateral modified zSiCNRs.

| System                    | Magnetic state | Electronic property | the gap in minority channel (eV) |
|---------------------------|----------------|---------------------|----------------------------------|
| H-zSiCNR-CN               | FM             | metal               | -                                |
| CN-zSiCNR-H               | FM             | metal               | -                                |
| H-zSiCNR-NO <sub>2</sub>  | AFM            | half-metal          | 0.305                            |
| NO <sub>2</sub> -zSiCNR-H | AFM            | half-metal          | 0.283                            |
| H-zSiCNR-CH <sub>3</sub>  | AFM            | half-metal          | 0.361                            |
| CH <sub>3</sub> -zSiCNR-H | AFM            | half-metal          | 0.449                            |
| H-zSiCNR-OH               | AFM            | half-metal          | 0.064                            |
| OH-zSiCNR-H               | AFM            | half-metal          | 0.364                            |
| H-zSiCNR-NH <sub>2</sub>  | FM             | metal               | -                                |
| NH <sub>2</sub> -zSiCNR-H | AFM            | half-metal          | 0.441                            |

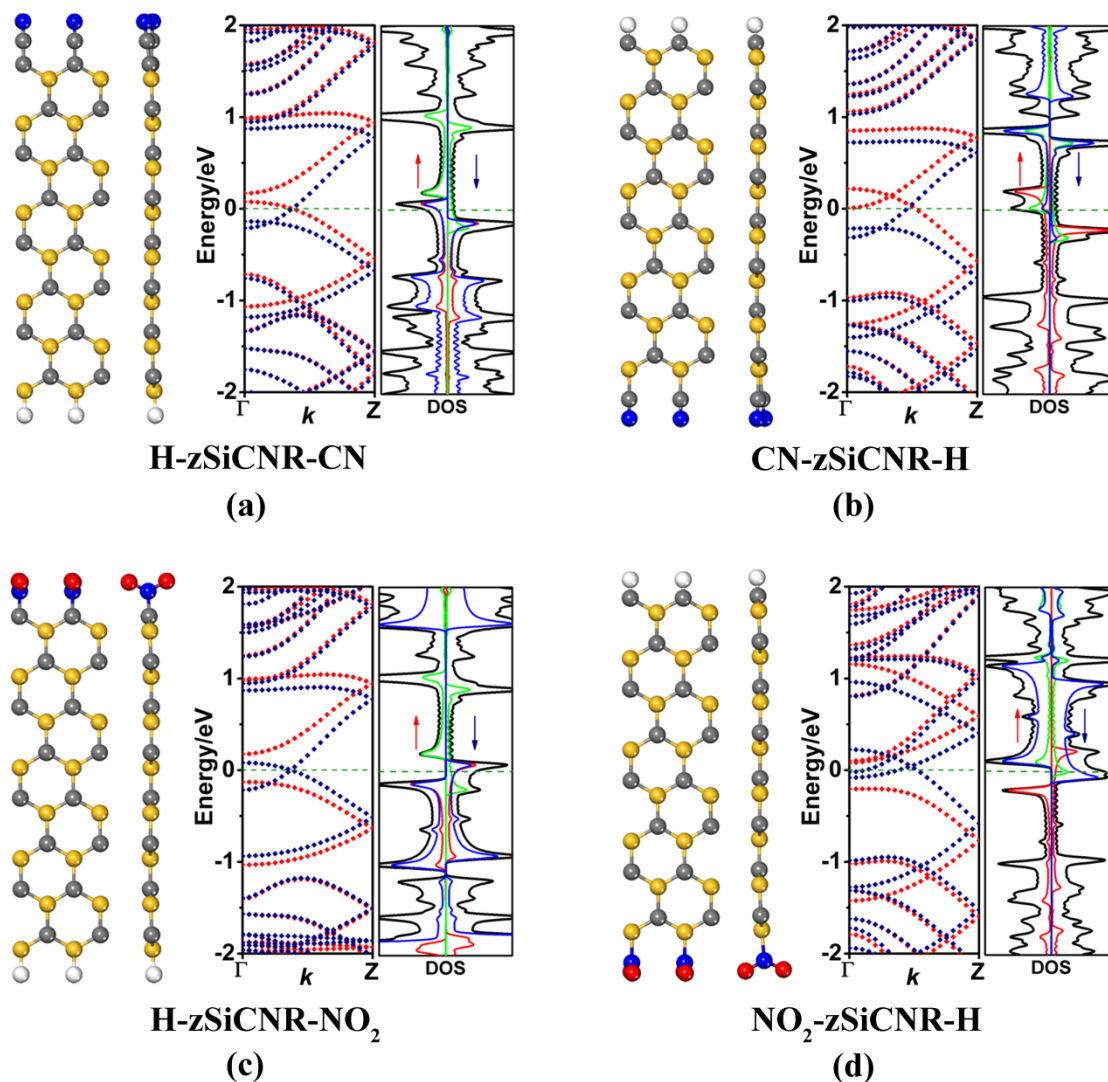

**Figure S1.** The geometries, electronic band structures, and according DOSs of the parallel state corresponding to the ground state for the unilateral modified zSiCNRs by using the electron acceptor group, namely, CN and NO<sub>2</sub>. The detailed marks about DOSs are the same as in Fig. 2.

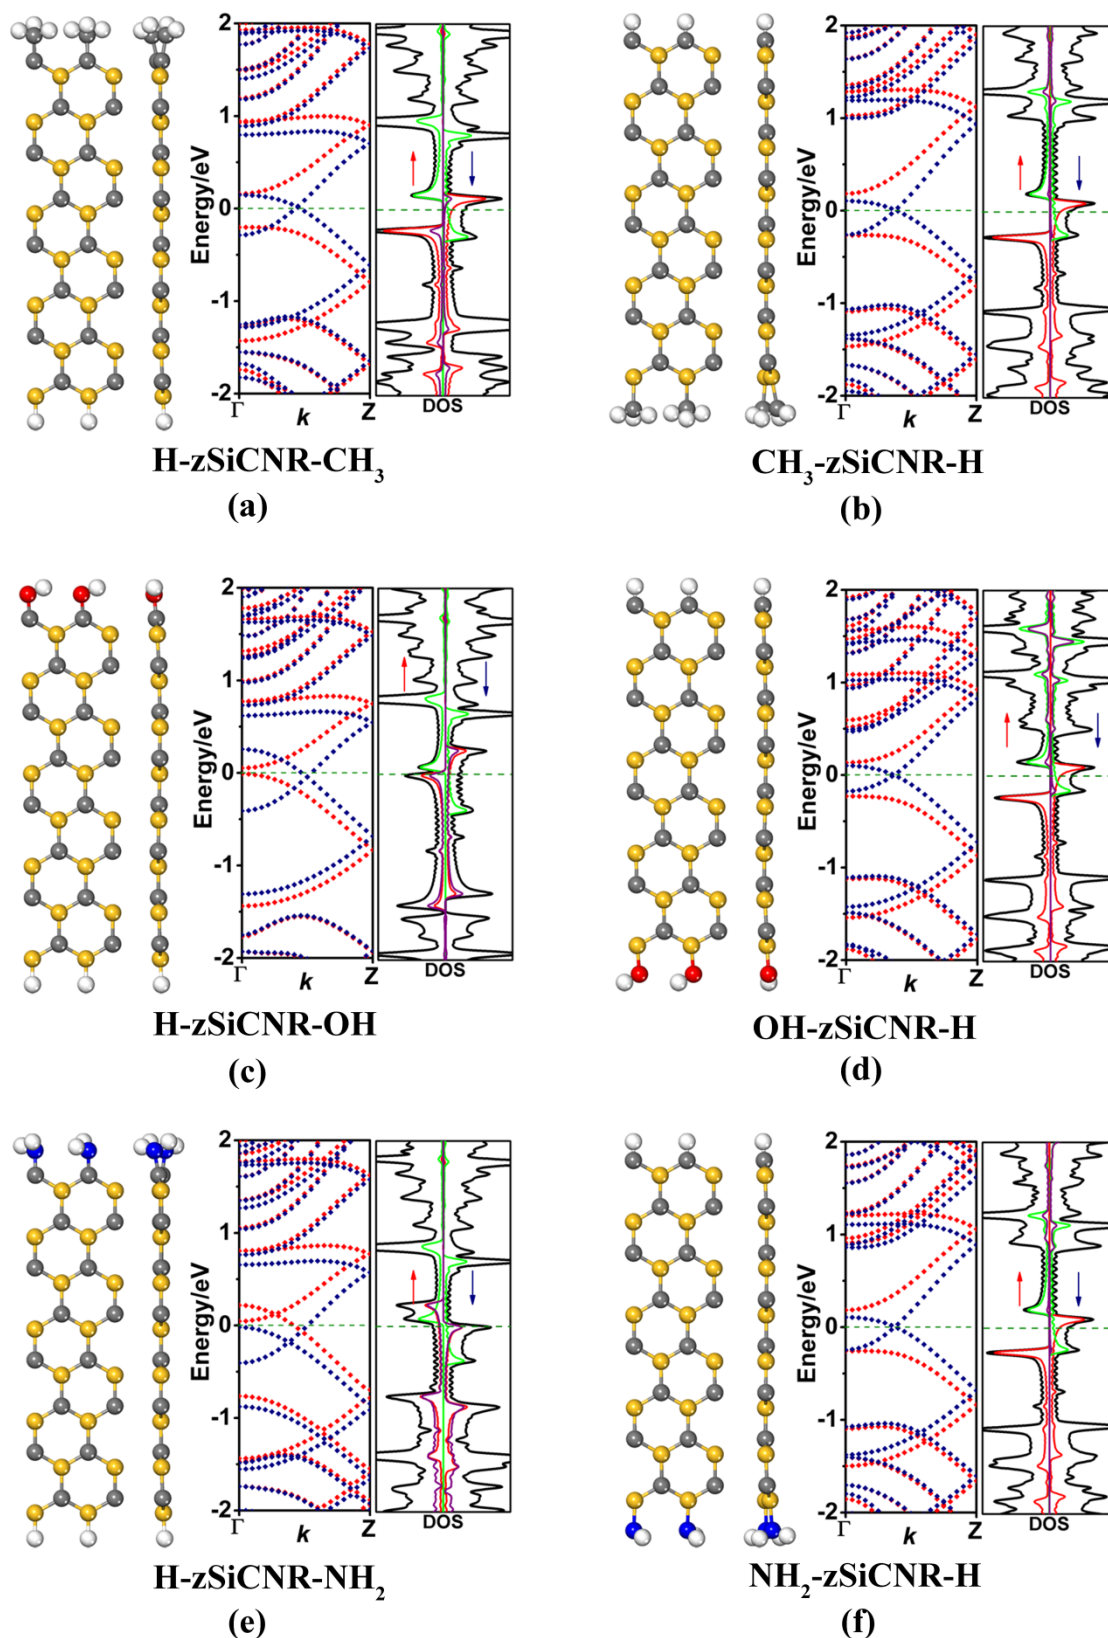

**Figure S2.** The geometries, electronic band structures, and according DOSs of the parallel state corresponding to the ground state for the unilateral modified zSiCNRs by using electron donor group namely, CH<sub>3</sub>, OH and NH<sub>2</sub>. The detailed marks about DOSs are the same as in Fig. 2.

**Table S2.** The magnetic state, the electronic property and the band gap in minority channel of the parallel state corresponding to the ground state for the bilateral modified zSiCNRs.

| System                                  | Magnetic state | Electronic property | the gap in minority channel (eV) |
|-----------------------------------------|----------------|---------------------|----------------------------------|
| CH <sub>3</sub> -zSiCNR-CN              | AFM            | half-metal          | 0.252                            |
| CN-zSiCNR-CH <sub>3</sub>               | AFM            | metal               | -                                |
| OH-zSiCNR-CN                            | AFM            | half-metal          | 0.252                            |
| CN-zSiCNR-OH                            | AFM            | metal               | -                                |
| NH <sub>2</sub> -zSiCNR-CN              | FM             | metal               | -                                |
| CN-zSiCNR-NH <sub>2</sub>               | FM             | metal               | -                                |
| CH <sub>3</sub> -zSiCNR-NO <sub>2</sub> | AFM            | half-metal          | 0.268                            |
| NO <sub>2</sub> -zSiCNR-CH <sub>3</sub> | AFM            | half-metal          | 0.278                            |
| OH-zSiCNR-NO <sub>2</sub>               | AFM            | half-metal          | 0.229                            |
| NO <sub>2</sub> -zSiCNR-OH              | AFM            | metal               | -                                |
| NH <sub>2</sub> -zSiCNR-NO <sub>2</sub> | AFM            | half-metal          | 0.279                            |
| NO <sub>2</sub> -zSiCNR-NH <sub>2</sub> | FM             | metal               | -                                |

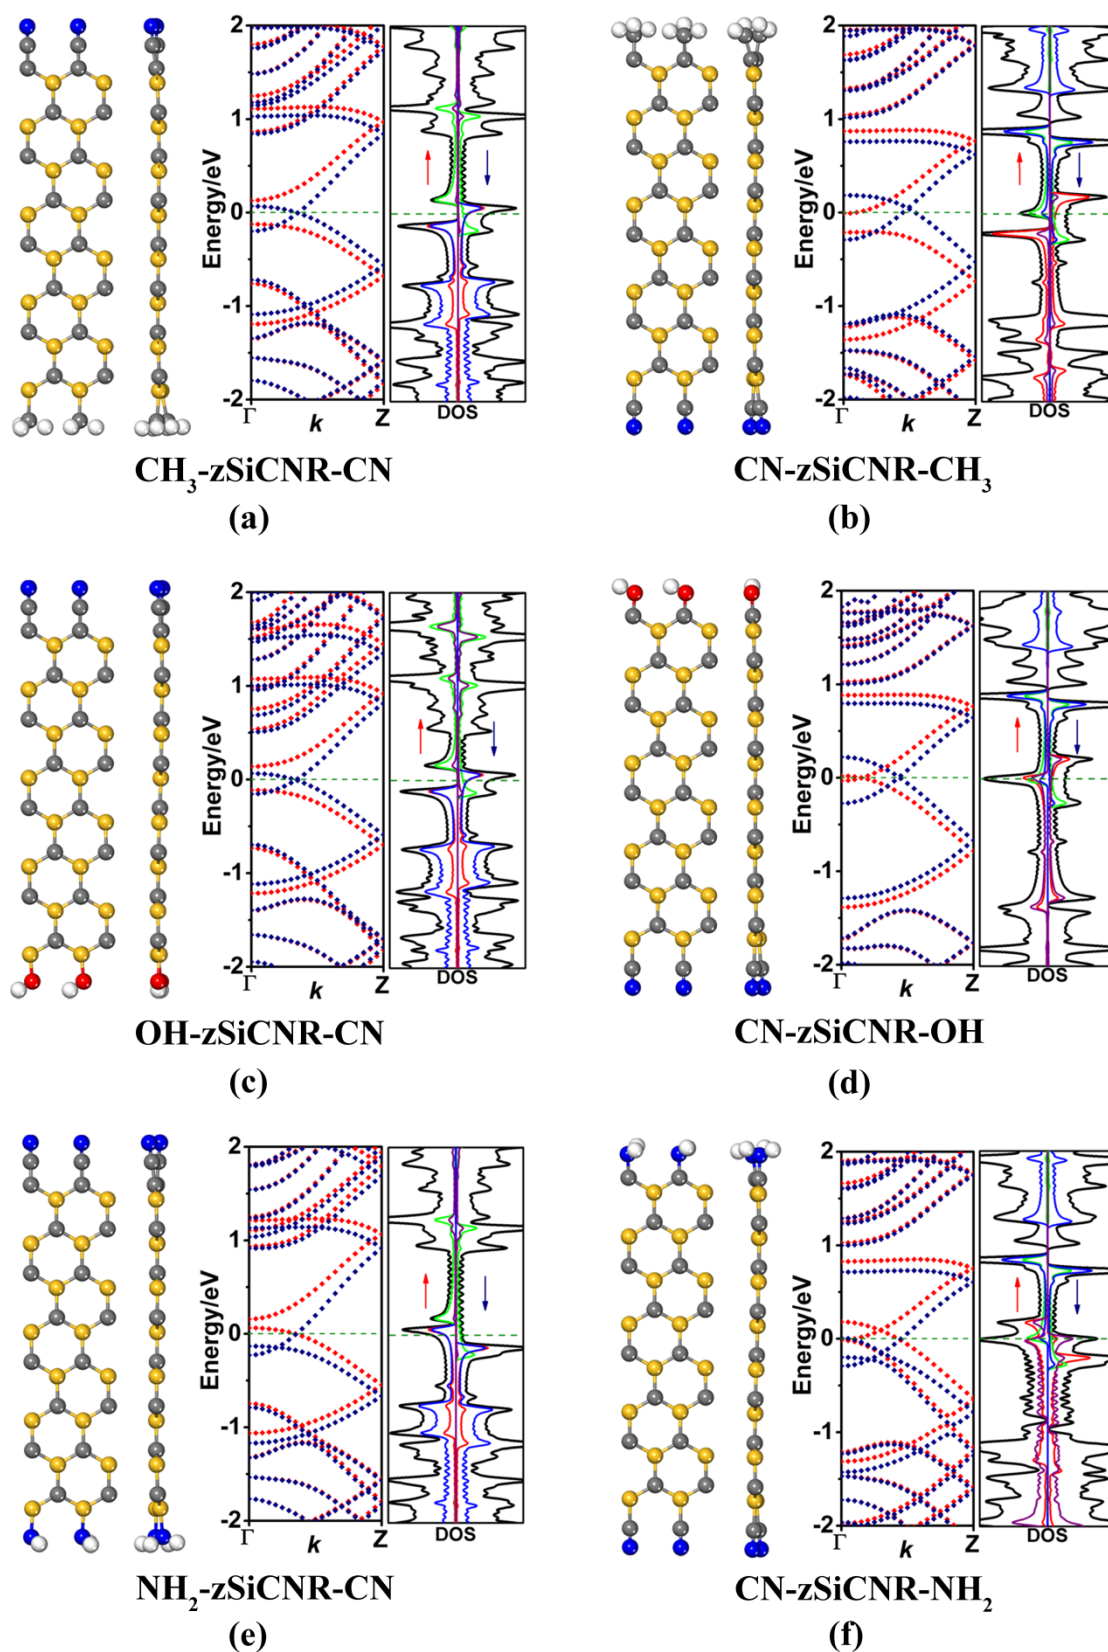

**Figure S3.** The geometries, electronic band structures, and according DOSs of the parallel state corresponding to the ground state for the bilateral modified zSiCNRs by using the electron acceptor group CN and donor group  $\text{CH}_3$ , OH or  $\text{NH}_2$ . The detailed marks about DOSs are the same as in Fig. 2.

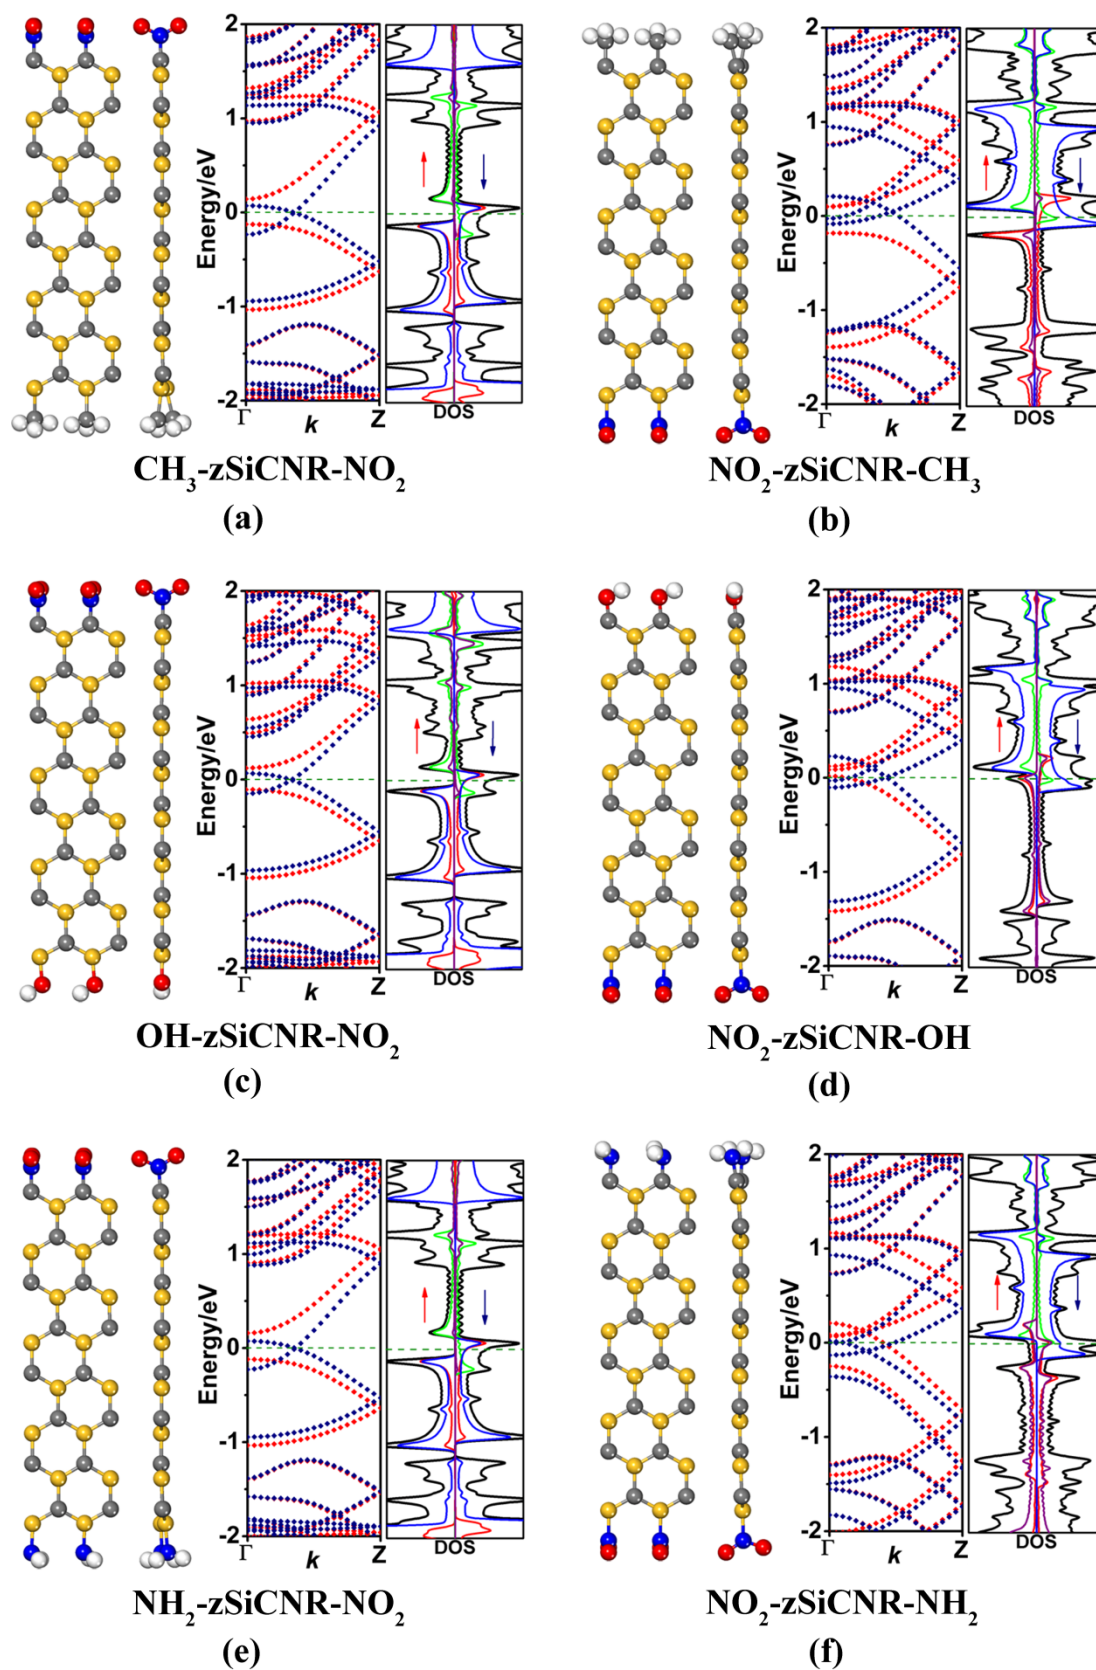

**Figure S4.** The geometries, electronic band structures, and according DOSs of the parallel state corresponding to the ground state for the bilateral modified zSiCNRs by using the electron acceptor group  $\text{NO}_2$  and donor group  $\text{CH}_3$ ,  $\text{OH}$  or  $\text{NH}_2$ . The detailed marks about DOSs are the same as in Fig. 2.
